# Supplementary material
Source: PubMed Central journal article supplement (PMC4197590)
Supplement: supp_dev.108019_DEV108019.pdf [file supp_dev.108019_DEV108019.pdf]

supplementary material Fig. S1.

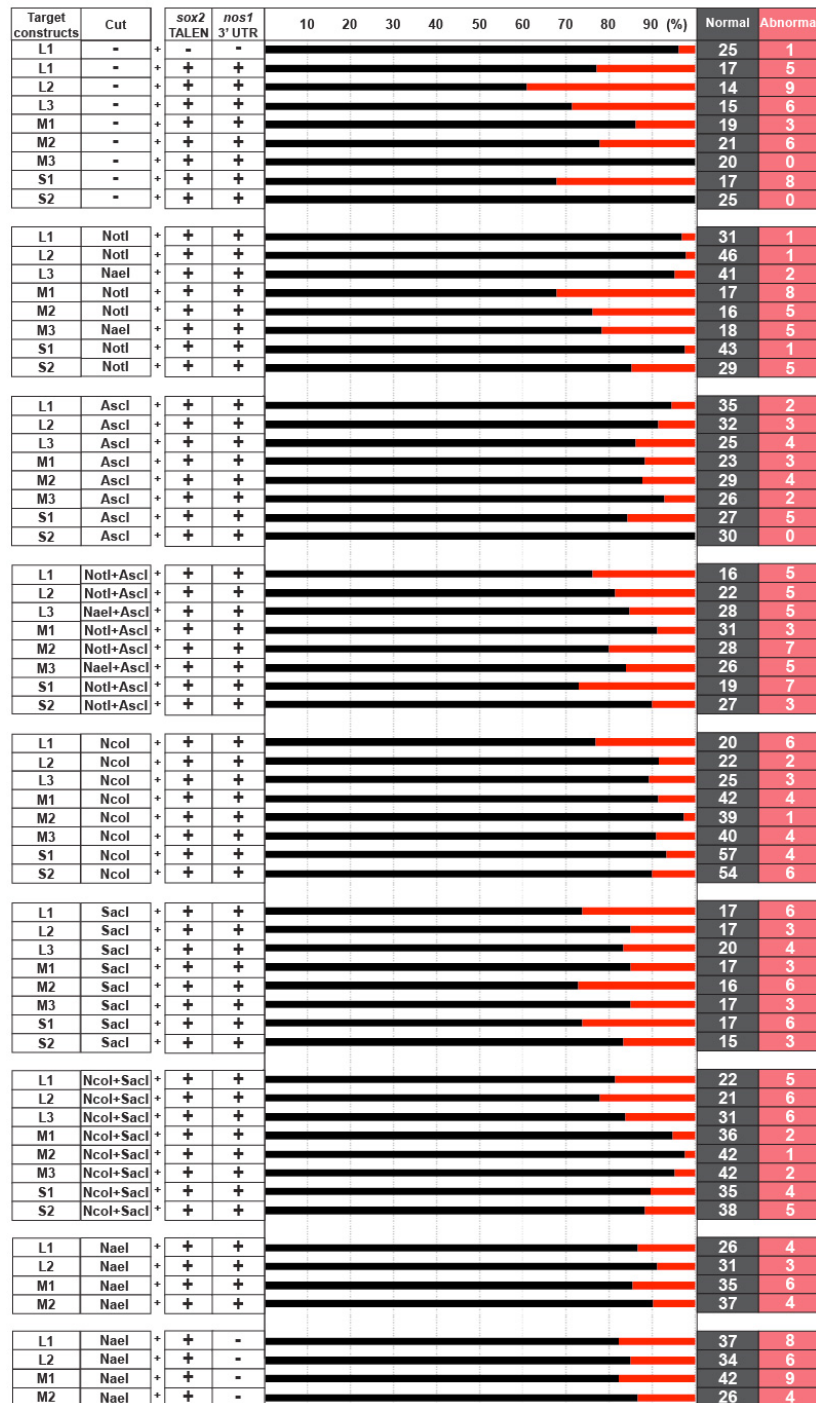

**Fig. S1. Effect of TALEN and targeting construct co-injection.** Graph depicting the percentage of normal (Black) and abnormal embryos (Red) in each co-injection condition. The constructs used and location of restriction sites are described in Fig. 2A-H.

supplementary material Fig. S2.

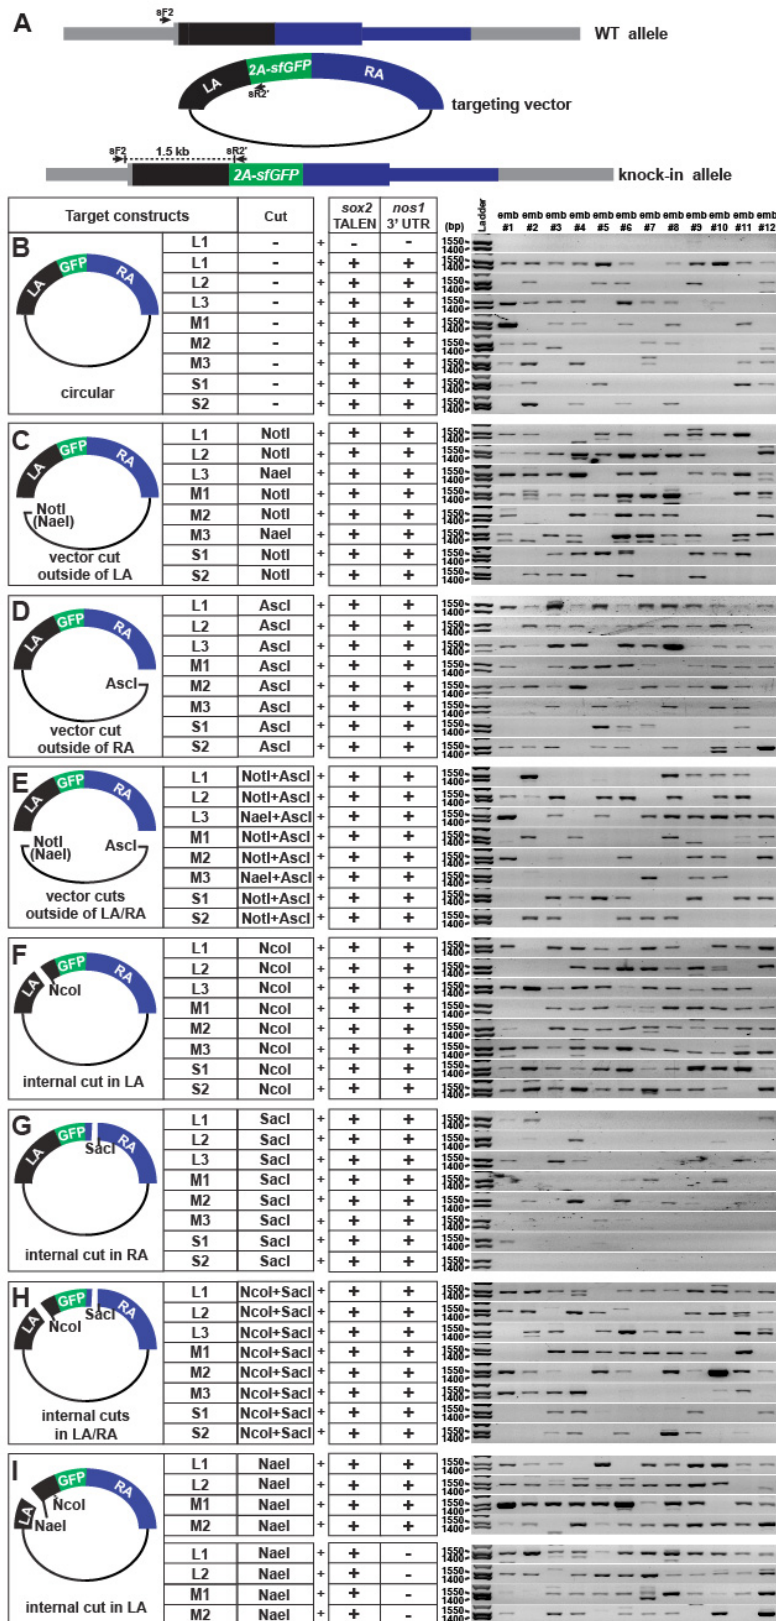

**Fig. S2. PCR-based recombination detection assay.** (A) Schematic representation of recombinant chromosome detection. A version of this data is shown in Fig. 2. Using a forward primer in the *sox2* gene just outside of the LA region (sF2) and a sfGFP-specific reverse primer (sR2'), the recombination event can be recognized by amplification of a 1.5 kb PCR product. (B-I) PCR-based recombination frequency analysis for each condition (12 embryos per each condition). Each lane represents a single embryo. Only 1.5 kb PCR products were counted as recombination-positive. (B) Circular form of targeting constructs. (C) NotI (NaeI)-digested targeting constructs. (D) AscI-digested targeting constructs. (E) NotI (NaeI)+AscI-digested targeting constructs. (F) NcoI-digested targeting constructs. (G) SacI-digested targeting constructs. (H) NcoI+SacI-digested targeting constructs. (I) Targeting constructs were digested with NaeI within the LA. *sox2* TALEN RNAs with or without *nos1* 3' UTR were used for each condition.

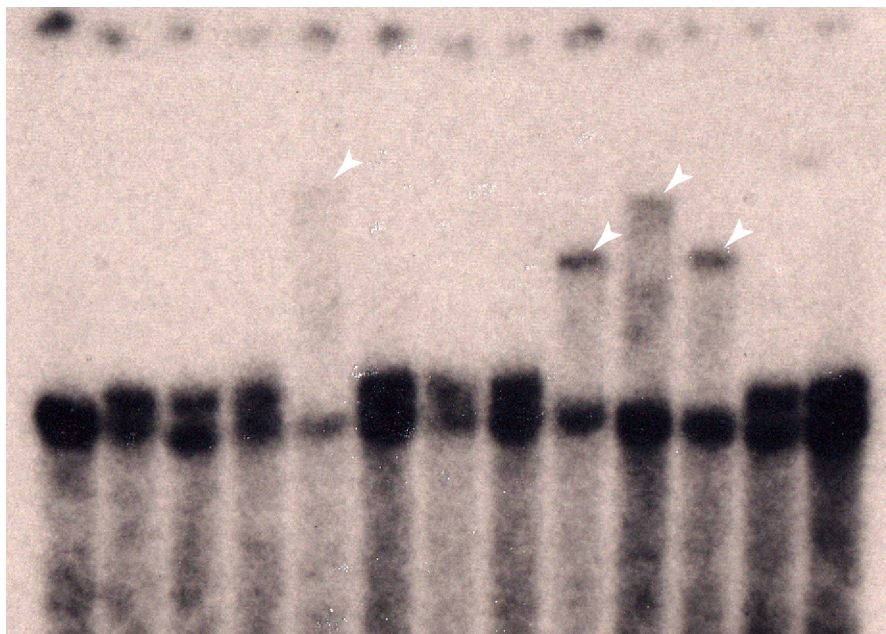

**Fig. S3. Overexposure of the Southern blot analysis shown in Fig. 4B.** A smear insertion band is detected with wild-type band in #4 line (see Results for detail).

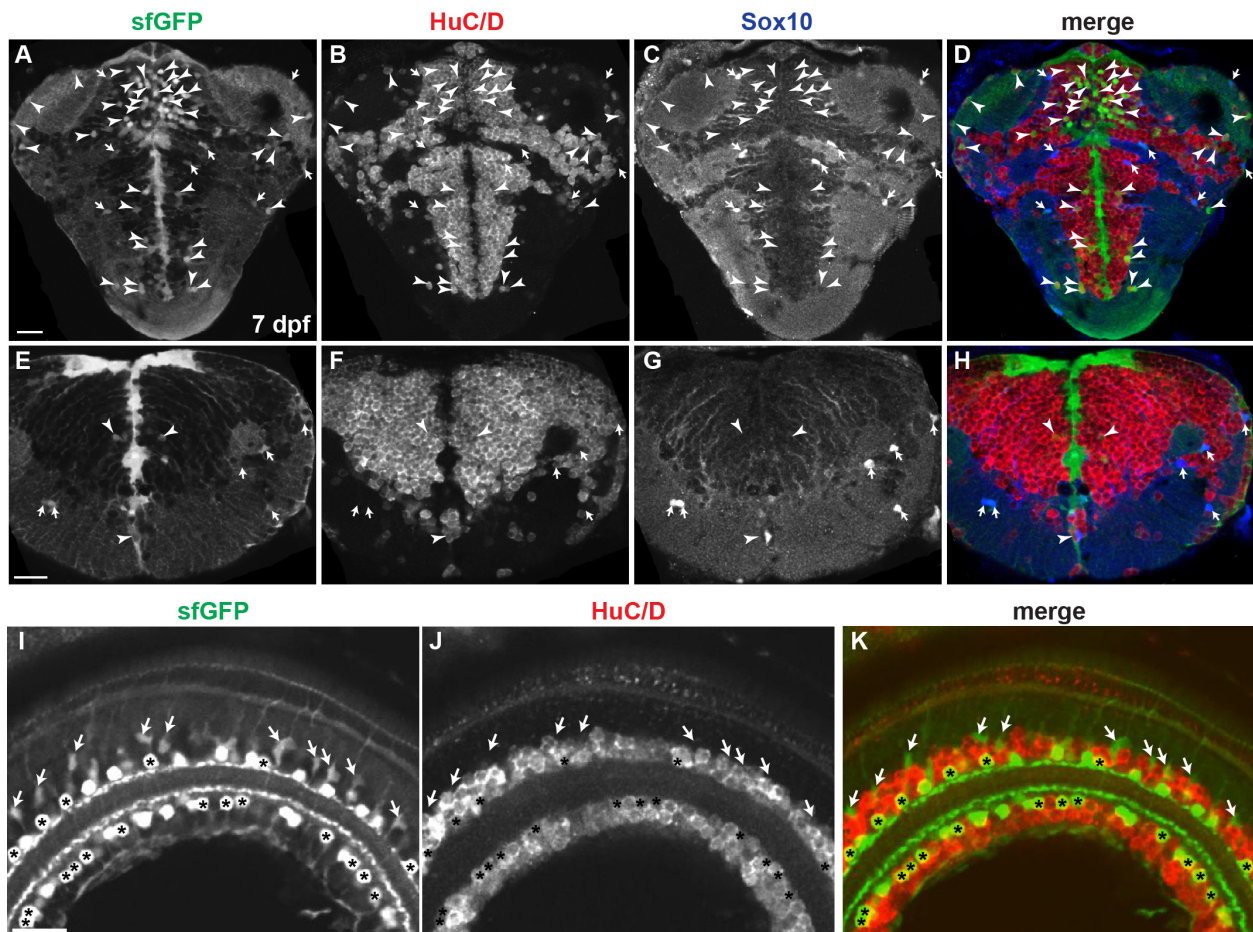

**Fig. S4. Analysis of sfGFP-positive cells of *sox2-2a-sfGFP* line.** Confocal microscope images. All images are transverse sections of 7 dpf *sox2-2a-sfGFP* larvae. (A-H) Arrowheads indicate HuC/D-positive, sfGFP-positive neurons. Arrows indicate Sox10-positive, sfGFP-positive OPCs. (A-D) Most sfGFP-positive cells are located in periventricular zones of the telencephalon and diencephalon. (E-H) Most sfGFP-positive cells are located in ventricular zones of the hindbrain. (I-K) Asterisks mark HuC/D-positive, sfGFP-positive cells that are putative amacrine cells. Arrows indicate HuC/D-negative, sfGFP-positive cells that are resembled as Müller glia morphologically.

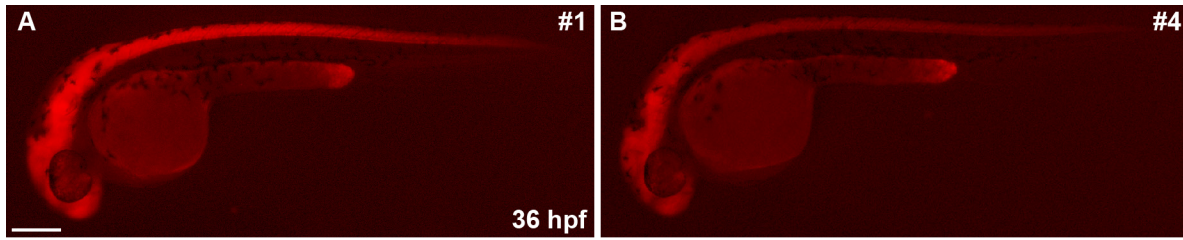

**Fig. S5. Comparison of tdTomato expression between strongly and weakly expressing *gfap-2a-tdTomato* F1 lines.** Lateral views of 36 hpf embryos. Epifluorescence stereomicroscope images of (A) a strongly expressing tdTomato-positive F1 embryo obtained from #1 line and (B) a weakly expressing tdTomato-positive F1 embryo obtained from #4 line. All images were taken with the same exposure time. Scale bar, 200  $\mu\text{m}$ .









|                                                                                                                                                                                                                                                                                                                                                                                                                                                                                                                                                                                                                                                                                                                                                                                                                                                                                                                                                                                                                                                                                                                                                                                                                                                                                                                                                                                                                                                                                                                                                                                                                                                                                                                                                                                                                                                                                                                                                                                                                                                                                                                                                                                                                                                                                                                                                                                                                                                                                                                                                                                                                                                                                                                                                                                                                                                                                                                                                                                                                                                                                                                                                                                                                                                                                                                                                                                                                                                                                                                                                                                                                                                                                                                                                                                                                                                                                                                                                                                                                                                                                                                                                                                                                                                                                                                                                                                                                                                                                                                                                                                                                                                                                                                                                                                                                                                                                                       |                                                                                                                                                                                                                                                                                                                                                                                                              |
|-------------------------------------------------------------------------------------------------------------------------------------------------------------------------------------------------------------------------------------------------------------------------------------------------------------------------------------------------------------------------------------------------------------------------------------------------------------------------------------------------------------------------------------------------------------------------------------------------------------------------------------------------------------------------------------------------------------------------------------------------------------------------------------------------------------------------------------------------------------------------------------------------------------------------------------------------------------------------------------------------------------------------------------------------------------------------------------------------------------------------------------------------------------------------------------------------------------------------------------------------------------------------------------------------------------------------------------------------------------------------------------------------------------------------------------------------------------------------------------------------------------------------------------------------------------------------------------------------------------------------------------------------------------------------------------------------------------------------------------------------------------------------------------------------------------------------------------------------------------------------------------------------------------------------------------------------------------------------------------------------------------------------------------------------------------------------------------------------------------------------------------------------------------------------------------------------------------------------------------------------------------------------------------------------------------------------------------------------------------------------------------------------------------------------------------------------------------------------------------------------------------------------------------------------------------------------------------------------------------------------------------------------------------------------------------------------------------------------------------------------------------------------------------------------------------------------------------------------------------------------------------------------------------------------------------------------------------------------------------------------------------------------------------------------------------------------------------------------------------------------------------------------------------------------------------------------------------------------------------------------------------------------------------------------------------------------------------------------------------------------------------------------------------------------------------------------------------------------------------------------------------------------------------------------------------------------------------------------------------------------------------------------------------------------------------------------------------------------------------------------------------------------------------------------------------------------------------------------------------------------------------------------------------------------------------------------------------------------------------------------------------------------------------------------------------------------------------------------------------------------------------------------------------------------------------------------------------------------------------------------------------------------------------------------------------------------------------------------------------------------------------------------------------------------------------------------------------------------------------------------------------------------------------------------------------------------------------------------------------------------------------------------------------------------------------------------------------------------------------------------------------------------------------------------------------------------------------------------------------------------------------------------------|--------------------------------------------------------------------------------------------------------------------------------------------------------------------------------------------------------------------------------------------------------------------------------------------------------------------------------------------------------------------------------------------------------------|
| <pre> aaatcctctgagcaaaatttactcaacttcagagagtaaatgtatctctttaaataagggc aaacaggttggaataataaaagctcgtggtttggagttgcttaatgatcctctgctga gatttcaaaagagatccatgtactatatttccagctgatttccatcctaagatgtgactga tttcagtttagtttttctgtttctctctgtgtttctgttttataacaacaacaatcagt gctcaatcatcccccaataaactcttcaatttttcaataaacatgagtaactttaaacat ttaaaaaagaccaaataactgtcctaactgagtaaaatttactcagagagattttgctgtt aacttttttacttaagtatttagttcattataactaaatttactctatattccagtcata aatttgtattcctgtctcaaatgtaatatctctttcactgttaaaaagattcaggatccc acacaactcaaaataaataacttttttactaaatttttagggttttttcactttattt gggtagggcagtgagggttacagactggatagattgggagcagaggggggaaaggtt tgcaaaaggaccttaagccgagaatcgaactcggatcaccataagaacctgggtctatg tgttgcgcaacttaaccactaggctataggccgaccgataaagtaacttcaataaag tggattaaacataaaaacttaagttgtccccaaaaacatctcaagaattgtgttattc tgctcattctctatttacacattctctcttccgagatcattaaagag<b>tcactacgga</b> <b>gaggaagga</b>ctgccaaggttccggagccacgaaacttctctctgTTAAAGCAAGCAGGAGA CGTGAAGAAAACCCGGTCTGTGAGCAAGGGCAGGAGGTATCAAGAGTTTATGCG CTTCAAGGTCGCGATGGAGGGCTCCATGAACGGCCACAGATTTCGAGATCGAGGGCGAGGG CGAGGGCCGCCCTACGAGGGCCACCCAGACCAGCTGAAGGTGACCAAGGGCGGCC CCTGCCCTTCGCTGGGACATCCTGTCCCCCAGTTTCTGTACGGCTTCAAGGGCTACGT GAAGCACCCCGCCGACATCCCGATTACAAGAAGCTGCTTCCCGAGGGCTTCAAGTG GGAGCGCGTGAATCTTCGAGGACGGCGGTGGTGCCTGACCGAGGACTCCTCCTC CGAGGACGGCAGCTGATCTACAAGTGAAGTGGCGGCACCACTTCCCCCGACGG CCCCGTAATGCAGAAGAACCATTGGGCTGGGAGGCCCTCCACCGAGCGCTTACCCCG CGACGGCGTCTGAAGGGCGAGATCCACAGGCCCTGAAGCTGAAGGACGGCGCCACTA CCTGGTGGAGTTCAAGACCATCTCATGCGCAAGAGCCCGTCAACTGCCCGTACTA CTACGTGGACACCAAGCTGGACATCACCTCCCAACAGGAGTACACCATCGTGAACA GTACGAGCGCTCCGAGGGCCGCCACCTGTTCTGGGGCATGGCACCGGACGACCGG CAGCGGCAGCTCCGGCACCGCTCCTCCGAGGACAACAATGGCCGTGATAAAGGAATT TATGAGGTTTAAAGTCAGGATGGAAGGGAGTGAATGGGCACGAGTTCGAGATCGAGG GGAAGGGGAAGGAGACCGTATGAGGTCACAAACGGCGAACTGAAGGTGACCAAGG CGACCAATTACCTTTTGGTGGGATTTTAAAGTCGCAATTTATGTACGGCTCAAGG GTATGTTAAACATCTCTGTATATACGACATATAAAAAATTTCTTCCCGAGGGCTT CAAGTGGGAGGGTTCATGAATTTGAAGTGGTGGTGGTGGTACCGTCAAGGACTC CTCCCTCGAGGACGGAAACATTAATTTATAAAGTCAAAATGAGAGGAACAAATTTCTCC CGACGGCCCCGTAAATGCAGAAAAAACGATGGGTTGGGAAGCGAGTACGAAAAAGTTATA TCCCCGACGGCGTGTGAAGGGCGAAATACATCAAGCGTTAAAAATTAAGATGGAGA ACATTACCTGGTGGAGTTCAAGACCATATATATGGCGAAAAAACCGACTCCAGTTACCTGG TATTTATATATGTCGATACGAAATAGATATACGAGTCATAATGAAGACTACACCATCTG GGACAGTACGAAAGGAGTGAAGGGAGGACATTTATTTTATACGGCATGGACGAGCT GTACAAGtaagt<b>gagc</b><b>tcagacactggcttggctgca</b>gaagaagatctccttcaatg ctcaggaagctgtgtttgtcaaaccttatttttctcaccactttcctctctctctc ctggtatataagttcagtgaaactgtattcactgttttttagcaactactatagtttt gatctcttttctcctgggctctctttttatctgtctgtttctctctgtgcagagatcc ttgcaagatagtagactagtttctcgcagaatgtgctataaaaagtcatggttggacaga tgaagttaaacagtaggacaagatgtagctagtggtcagagcaggtggaaatagttt tttttttatcaagcataaattgtagagaacaagttcttgagcttattgtagtctttaa gaatgccagaagaaaaaaagagctagtctgagctggtagtatttaactctgaacagtag gtgttaaagtaagcagaaggaattttaaagcaagatgtttgtaagagttttaaagga atgatggatttggctcagcgggtgctatttgaacattttactccacattttttgtcctcct ccactgtgtgtgctcagtttttgacagtagtaactcatctcttggacctaggtt aaaatgctttaaattgctcgttgacacattactgacctgtagaagacatataaatcttaa cattaaagcatctactgaatgaattatggtataaatactgacacaggtgtccccatcat gtgaccagatcatttgattcagattataactgatagcttcaattgtcagccttacattt cctggtgaaattgagcaattttccatttccctctgtgtgatcaggcacttttgcatga gggtgaaaggttccctcctcaggtttatgctttacatttgaggtgttattctgaaatgcaaca aatacatcttgggttgaagtgacttaagtgaagcagttttcacacatcactacaat gttaataatatagcataataataatacaaacctgtgaccatacttcaactgtgagataaca ttgcttggattacaccggttttcaactaagatggactaaactttcactgaattggacatt actcattgtgtgctctataataatagaataaaaaaaagaacatttttatatgtta gttcggtctgtttgtcaactaatatctatgttaagtgctcagcactgcaactgatacat tatgataatatagacctataaaagtttagattgtagcttttaaaactgcaattgacctg tatttggtaataaacactttcttttttaaacctcgtcacactatgaacctgaaaaa ggctttagggcttgaaggttaacatacaaaaaaaaggaagtaacagttctctctttt gacaaaaacatcctagtagtgcctcaagcaacaagttggttaacataatfactgtgtgtt agttaacacagtaacccttgggaagtttaacctggcaattgtgtcaaatgtgataca aagcaaaaatagtaatacaaacctccaacaagcaacaacaacaacattaaactatc tatgatggctacttctaccataataattttaaagtgaccataaaactgtagttaat ttttagaagcaaatgctaaagcaagatgctaaaatgttagtaacattatagcaaacatg tgaatttacatataagcaaaaactatgttttactgtttgtgctaaacatgtagtg atgtgctaaactagcaatagttgaattaacaggtttaaacaactgttgcttcatggaaa aatagccaaagtaatcccttaacaaaaagataaaaaacatctccgaacaactcagttactac aaagttaaaccgataataacaggctaatcattgttatcttgtttattgtctttgattag cgattacatgactttaaaccctcagctggatttactcaaggttttaacaatacaacc ttctgattagacttaagccagcataaaaagtttctcaaaaactcaactatttatattt ttgggtgaaatggttagctgtagatgacttacgtctgtatgtcactcatttcagca tagctgaaacatctgacagtgaaacaaataaaaaggacagtttaggttagcagcatc ttgaaatatactagctattttgcaactataaaaaacatgtttaaactgtagcaag ttgtaacaaatggtggctacacctaaacaagttctaaaacgtgctagaacaatttagcta catattgaaactgctaatcttaattaaatttggattgtttataaaccttaacaatt acttgtatctagggcagggcaatttggc </pre> | <pre> agctatattttttcggttattcagcattattttggaagtttttaatatatgagctt gocgttttaacttaaaaaaacttttatttttattttcagtgctttaaaggtttaaactgatg tgttgaatacacaacacttacactaaaaacaagcgataaataataatagtaataataata ataataataataaaaacttttaagtttatttttagaactcttagatcacaagagtttgatt ggaaaaatggtttgtgtaaatattctcacttttagctctctataaacacacacacaca cacactcacagccactgccctggctctcgctgcaactgctgacctcctgaacccggc cctttatgcaaacagggagcaga </pre> |
|-------------------------------------------------------------------------------------------------------------------------------------------------------------------------------------------------------------------------------------------------------------------------------------------------------------------------------------------------------------------------------------------------------------------------------------------------------------------------------------------------------------------------------------------------------------------------------------------------------------------------------------------------------------------------------------------------------------------------------------------------------------------------------------------------------------------------------------------------------------------------------------------------------------------------------------------------------------------------------------------------------------------------------------------------------------------------------------------------------------------------------------------------------------------------------------------------------------------------------------------------------------------------------------------------------------------------------------------------------------------------------------------------------------------------------------------------------------------------------------------------------------------------------------------------------------------------------------------------------------------------------------------------------------------------------------------------------------------------------------------------------------------------------------------------------------------------------------------------------------------------------------------------------------------------------------------------------------------------------------------------------------------------------------------------------------------------------------------------------------------------------------------------------------------------------------------------------------------------------------------------------------------------------------------------------------------------------------------------------------------------------------------------------------------------------------------------------------------------------------------------------------------------------------------------------------------------------------------------------------------------------------------------------------------------------------------------------------------------------------------------------------------------------------------------------------------------------------------------------------------------------------------------------------------------------------------------------------------------------------------------------------------------------------------------------------------------------------------------------------------------------------------------------------------------------------------------------------------------------------------------------------------------------------------------------------------------------------------------------------------------------------------------------------------------------------------------------------------------------------------------------------------------------------------------------------------------------------------------------------------------------------------------------------------------------------------------------------------------------------------------------------------------------------------------------------------------------------------------------------------------------------------------------------------------------------------------------------------------------------------------------------------------------------------------------------------------------------------------------------------------------------------------------------------------------------------------------------------------------------------------------------------------------------------------------------------------------------------------------------------------------------------------------------------------------------------------------------------------------------------------------------------------------------------------------------------------------------------------------------------------------------------------------------------------------------------------------------------------------------------------------------------------------------------------------------------------------------------------------------------------------------------------------|--------------------------------------------------------------------------------------------------------------------------------------------------------------------------------------------------------------------------------------------------------------------------------------------------------------------------------------------------------------------------------------------------------------|

Lowercase indicates zebrafish genomic DNA sequences and uppercase indicates sfGFP and tdTomato sequences. The sequences highlighted in yellow mark indicate TALEN target sequences.

**Table S2. Genotyping primers for knock-in analysis**

| Primer name    | Primer Description                                           | Primer sequence               |
|----------------|--------------------------------------------------------------|-------------------------------|
| sox2_gen0_F    | Forward primer for <i>sox2</i> TALEN target analysis         | GACCTGCGGGACATGATCAGTATGTA    |
| sox2_gen0_R    | Reverse primer for <i>sox2</i> TALEN target analysis         | TCCCTCCCCAAAAGAAGTGTCTGTA     |
| sF1            | <i>sGFP</i> specific forward primer                          | CTTCAGCCGCTACCCCGACCACAT      |
| sR1            | <i>sGFP</i> specific reverse primer                          | TCGCCTTGATGCCGTTCTCTGCT       |
| sF2            | Forward primer outside of the LA region in <i>sox2</i> locus | GTAACCCCGCCCTTTATGCAAACCG     |
| sR2            | <i>sGFP</i> specific reverse primer                          | GTCTTGTAGGTGCCGTCGTCCTTG      |
| sR2'           | <i>sGFP</i> specific reverse primer                          | TTGCCGGTGGTGACAGATGAACTTCAG   |
| sF3            | <i>sGFP</i> specific forward primer                          | AGTCCGTCCTGAGCAAAGACCCCAAC    |
| sR3            | Reverse primer outside of the RA region in <i>sox2</i> locus | AGTGCTCCCTGACCCTTTGAGAGTCCG   |
| F4             | Vector specific forward primer                               | CTCTGGCCCGTGTCTCAAAATCTCTG    |
| R4             | Vector specific reverse primer                               | TTCAGAAACAACCTCTGGCGCATCGG    |
| qF             | Forward primer for qPCR Reference                            | TGAGTTCGACTTTTGTACACCACA      |
| qR             | Reverse primer for qPCR Reference                            | AGCGCTTCAGATTTTGTGTTTCA       |
| gfap_gen0_F    | Forward primer for <i>gfap</i> TALEN target analysis         | TTCGCAGATCATTAAAGAGTCCACTACGG |
| gfap_gen0_R    | Reverse primer for <i>gfap</i> TALEN target analysis         | CAGGAGAGAAGCAGGGAAAGTTGGTG    |
| gF1            | <i>tdTomato</i> specific forward primer                      | GGGCGAGGAGGTCATCAAAGAGTTC     |
| gR1            | <i>tdTomato</i> specific reverse primer                      | AGCTTCTTGTAATCGGGGATGTCGG     |
| gF2            | Forward primer outside of the LA region in <i>gfap</i> locus | AACACTAGGAGGCGCTGTTCATCAACC   |
| gR2            | <i>tdTomato</i> specific reverse primer                      | TTTCTCCACGTCTCTGCTTGCTTT      |
| gF3            | <i>tdTomato</i> specific reverse primer                      | TTGAAGATGGTGGGTTAGTTACGGTCA   |
| gR3            | Reverse primer outside of the LA region in <i>gfap</i> locus | GGTGGAAGGTCGAAATTTAGGCAATGT   |
| sox2_T7Egen0_F | Forward primer for <i>sox2</i> gRNA target analysis          | CTTCCTCCCCAGCAAAGTACCTCC      |
| sox2_T7Egen0_R | Reverse primer for <i>sox2</i> gRNA target analysis          | TAATCCGGGTGTTCCCTCATGTGCAG    |
| gfap_T7Egen0_F | Forward primer for <i>gfap</i> gRNA target analysis          | CAGCGTTCCTTCTCATCTACCGAAA     |
| gfap_T7Egen0_R | Forward primer for <i>gfap</i> gRNA target analysis          | CAGCATTGAGTCCATCCACCTGTCTG    |
